# Supplementary material for: An etching–templating dual strategy for the in situ synthesis of carbon-supported iron metaphosphate and its application as an electrocatalyst
Source: Royal Society of Chemistry journal article supplement (doi:10.1039/d5nr03401a), 2025-11-27
Supplement: d5nr03401a1.pdf [file d5nr03401a1.pdf]

## Supporting Information

### **An etching-templating dual strategy for the *in situ* synthesis of carbon-supported iron metaphosphate and application as electrocatalyst**

*Jingbo Huang, Junzheng Wei, Wei Sang, Qifu Zhang, Yongda Guo and Yating Hu\**

## **Outline**

**1. Experimental Section**

**2. Figures**

**3. Tables**

**4. References**

## 1. Experimental Section

**Chemicals:** Iron chloride hexahydrate ( $FeCl_3 \cdot 6H_2O$ , Macklin, 99%), Sodium hydroxide ( $NaOH$ , AR), n-Hexylphosphonic acid (HPA, Macklin, 98 %), Lauric acid ( $C_{12}H_{24}O_2$ , Macklin, 98 %), n-Hexane ( $C_6H_{14}$ , Macklin,  $\geq 98$  %, GC), N, N-Dimethylformamide (DMF, Macklin, 99.5 %), Nafion® perfluorinated resin-aqueous dispersion (Aladdin, 5 wt.% in water), Carbon black (Macklin, xc-72R, 10-20 nm) and ethanol ( $CH_3CH_2OH$ , Macklin, 95 %), commercial platinum carbon catalysts (Pt/C, 20wt. % Pt supported on carbon black).

**Synthesis of  $Fe_3O_4$  nano-size octahedra:**  $Fe_3O_4$  nano-size octahedra was synthesized following a hydrothermal method reported by Zong et al.<sup>1</sup>

**Synthesis of Fe-HPA:** 1 mmol of  $Fe_3O_4$  nano-size octahedra was dispersed and ultrasonicated in 6 ml of n-hexane for 30 min. Subsequently, 8 mmol of HPA and 30 g of lauric acid were added. The mixture was heated to 60 °C under vigorous stirring, with  $N_2$  gas purged it for 1 hour to degas and remove n-hexane and air. Then, the  $Fe_3O_4$  nano-size octahedra and HPA in lauric acid solution were heated up to 295 °C under  $N_2$  atmosphere and refluxed at this temperature for 8 h. After heating was completed, large amount of dark brown precipitate is observed. The mixture was cooled to 60 °C, followed by the addition of 40 ml DMF and stirring. DMF is used to dissolve lauric acid residue from the synthesized Fe-HPA product, as solidifies at room temperature. Fe-HPA precipitates was then collected by centrifugation. The precipitates were washed by DMF for 2 times and ethanol for 1 time to remove the residues of HPA and lauric acid. After drying in oven at 60 °C and grinding treatment, a grey powder was

collected.

### ***Synthesis of Iron (II) metaphosphate***

***Single-Step Heat Treatment:*** The as-synthesized Fe-HPA powder was placed in an alumina crucible and then placed in a tube furnace for heat treatment under N<sub>2</sub> atmosphere until the furnace was cooled down to below 100 °C.

***Two-Step Heat Treatment:*** Step1 (vacuum pyrolysis). The as-synthesized Fe-HPA powder was placed into an alumina crucible and then placed in the same tube furnace as like the *single-step heat treatment*. During the vacuum pyrolysis, the vacuum level was maintained at  $\sim 4 \times 10^{-4}$  mbar by using a mechanical pump and a turbo pump together. After holding period, the cooling process was conducted under N<sub>2</sub> atmosphere. Step 2 (annealing process). The product from Step 1 was retrieved, ground into fine powder, and re-placed into the crucible. This was then transferred back into the tube furnace for short-term annealing under N<sub>2</sub> atmosphere.

***Material Characterizations:*** The samples were analyzed using X-ray diffraction (XRD), transmission electron microscopy (TEM), Scanning electron spectroscopy (SEM), Energy-dispersive X-ray analysis (EDX), Thermal gravimetric analysis (TGA), N<sub>2</sub> adsorption/desorption, Raman spectroscopy and Fourier transform infrared (FTIR) spectroscopy. XRD patterns were obtained using a SmartLabTM 9 kW X-ray diffractometer (Cu K $\alpha$  radiation,  $\lambda=1.541$  Å) and with the scan rate of 10 °/min. TGA was done using SDT Q600 under N<sub>2</sub> from room temperature to 600 °C with 5 °C/min ramp rate. N<sub>2</sub> adsorption/desorption was done at 77 K using Micromeritics ASAP 2460 instrument; degas treatment: heated from room temperature to 160 °C at 5 °C/min ramp

rate and degassed for 12 h. SEM images were captured using a FEI Apreo C microscope, allowing for high-resolution imaging and analysis of the samples. TEM characterization were performed on a FEI Talos F200S 200 kV transmission electron microscope, coupled with a Super-XEDS for dispersive X-ray spectroscopy (EDS) and elemental mapping.

***Electrochemical measurements and calculations:*** Oxygen reduction reaction (ORR) catalytic activity and electrical impedance spectroscopy (EIS) of the samples were tested in a standard three-electrode system in 0.1 M KOH solution (PH=13.45), using a Pine WaveDriver 200. An Ag/AgCl electrode and a graphite rod were used as the reference electrode and counter electrode, respectively. Preparation of working electrodes: 2 mg of catalysts and 6  $\mu$ l of Nafion 117 solution (5 wt. %) were uniformly dispersed in 1 mL of carbon black dispersion (a mixture of 2 mg carbon black and 10 ml ethanol, with a concentration of 0.2 mg/ml for carbon black) by using ultrasonication for 1 h. 50  $\mu$ l of the dispersion was then dropped on the rotating disk electrode (RDE), or glassy carbon electrode (GCE) with a geometric area of 0.196 cm<sup>2</sup> and the loading of material on them was about 0.51 mg cm<sup>-2</sup>. The EIS was tested with a conventional three-electrode system by an IVIUM Vertex, across a frequency range of 10<sup>5</sup> to 0.1 Hz. ORR curves were collected at rotation rates ranging from 400 to 2000 rpm and the curve at 1600 rpm was used to obtain the onset potential (the tangent point where a tangent line is drawn at the intersection of the liner region and the reaction region in the i-E curve) and the scan rate was kept constant at 10 mV/s for all the Cyclic voltammetry (CV) and Linear sweep voltammetry (LSV) experiments. Unless otherwise mentioned,

20 cycles of pre-CV curves were collected at 50 mV/s in N<sub>2</sub>-saturated solution before conducting CV/LSV testing for activation and stabilization purposes. The electron transform number  $n$  was calculated based on the slopes of the Koutecky-Levich plots and Koutecky-Levich equation:

$$j_k = nFAD^{2/3}v^{-1/6}C^*$$

$j_k$ : Limiting diffusion current density (A/cm<sup>2</sup>)

$A$ : Electrode area (cm<sup>2</sup>)

$D$ : Reactant diffusion coefficient (cm<sup>2</sup>/s)

$v$ : Kinematic viscosity of the electrolyte (cm<sup>2</sup>/s)

$C^*$ : Bulk concentration of the reactant (mol/cm<sup>3</sup>)

To further verify the average number of electrons exchanged ( $n$ ) and the formation of byproducts, we also prepared 50 µl of the dispersion on the rotating ring-disk electrode (RRDE) for RRDE measurements. The RRDE measurements were performed in 0.1 M KOH solution and the LSVs were recorded at 10 mV/s between -1.0 and 0.25 V vs. Saturated Calomel Electrode (SCE) under N<sub>2</sub>- and O<sub>2</sub>- saturated electrolytes. The ring electrode was held at 1.3 V vs. Reversible Hydrogen Electrode (RHE) during the ORR measurements with the RRDE rotation rate of 1600 rpm. The hydrogen peroxide yield ( $H_2O_2\%$ ) and  $n$  during the ORR were determined by RRDE technique and calculated via the following equations ( $N=0.37$ ):

$$H_2O_2(\%) = 200 \times \frac{\frac{I_r}{N}}{I_d + \frac{I_r}{N}}$$

$$n = 4 \times \frac{I_d}{I_d + \frac{I_r}{N}}$$

$I_d$ : Disk current (A)

$I_r$ : Ring current (A)

$N$ : Current collection efficiency



## 2. Figures

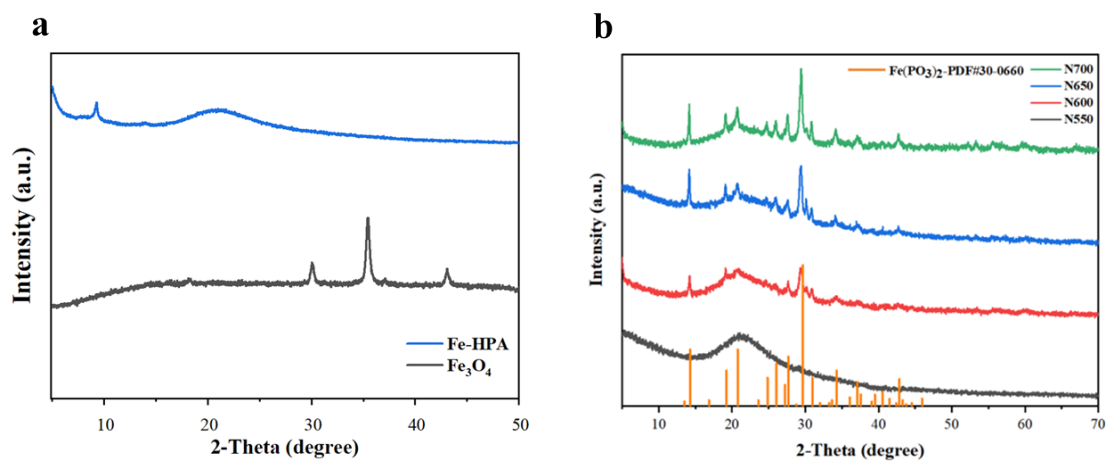

**Figure S1.** XRD patterns of (a) Fe<sub>3</sub>O<sub>4</sub> precursor and Fe-HPA and (b) N550, N600, N650 and N700.

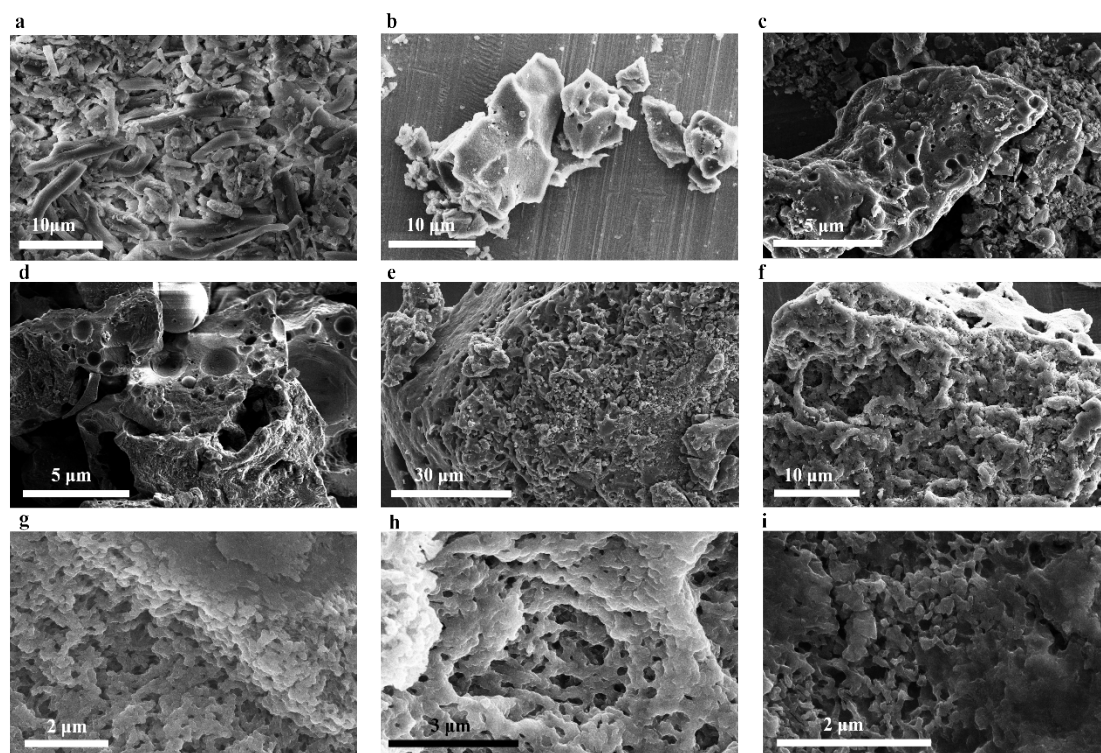

**Figure S2.** SEM images of (a) Fe-HPA, (b) N550, (c) N600, (d) N650, (e) V450-N650, (f) V450-N700, (g) V450-0.5h, (h) V500-1.5h and (i) V550-1h.



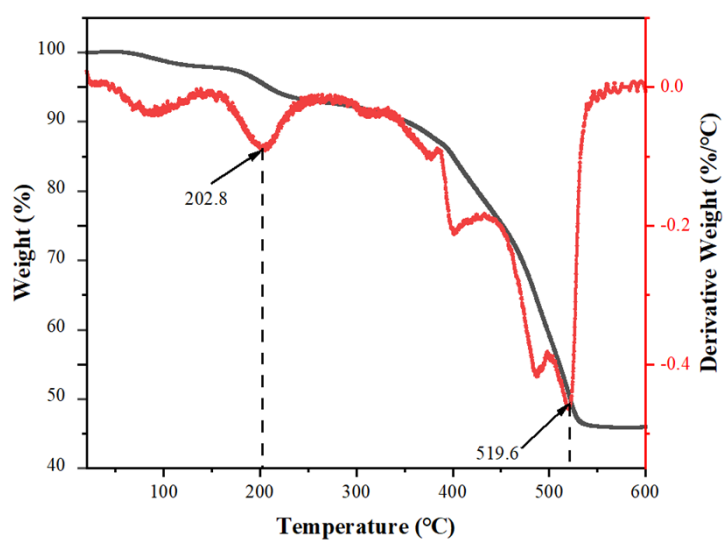

**Figure S3.** TGA and derivative thermogravimetry (DTG) curves for Fe-HPA pyrolyzed in N<sub>2</sub> at the rate of 5 °C min<sup>-1</sup>.

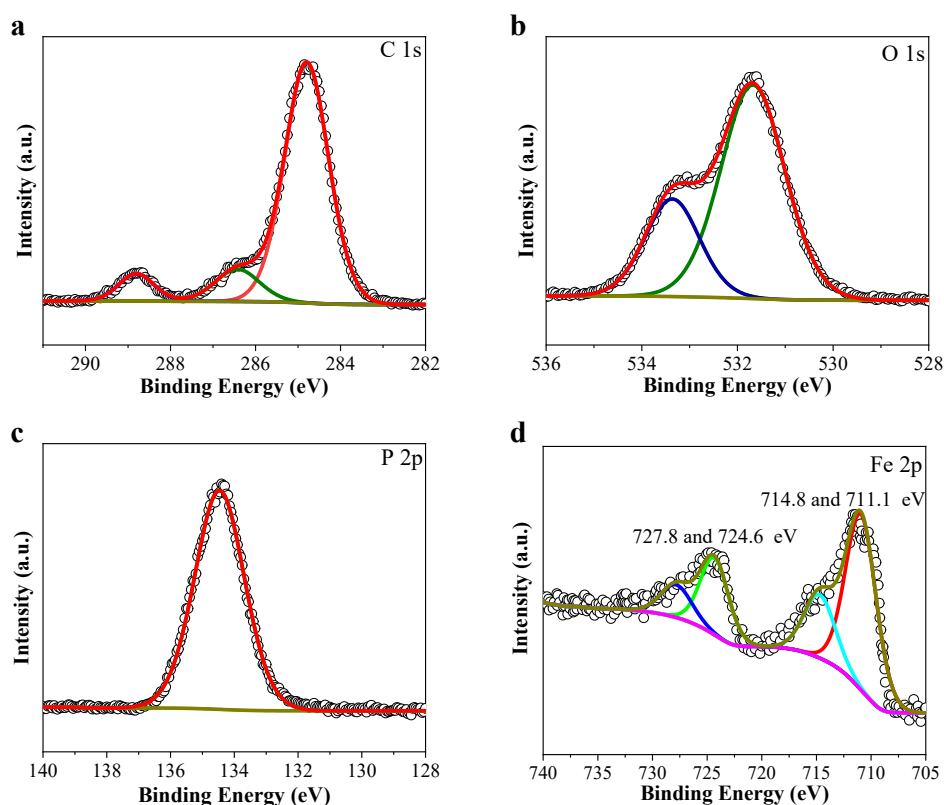

**Figure S4.** X-ray photoemission spectrum (XPS) spectrum of N700: (a) C 1s, (b) O 1s, (c) P 2p and (d) Fe 2p.

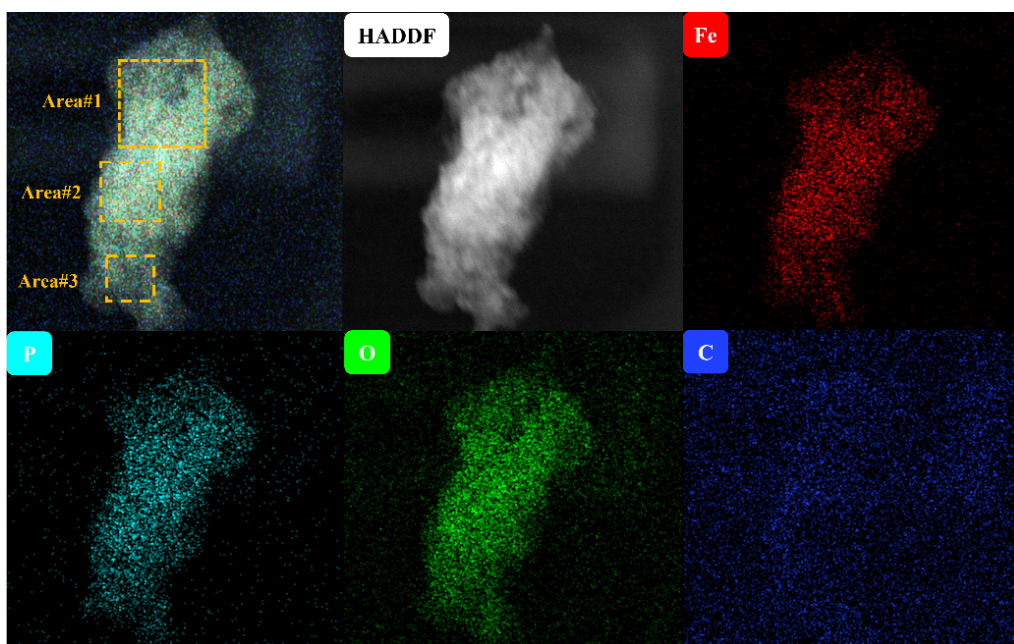

**Figure S5.** Energy-dispersive X-ray spectroscopy (EDS) images of V450-N700.

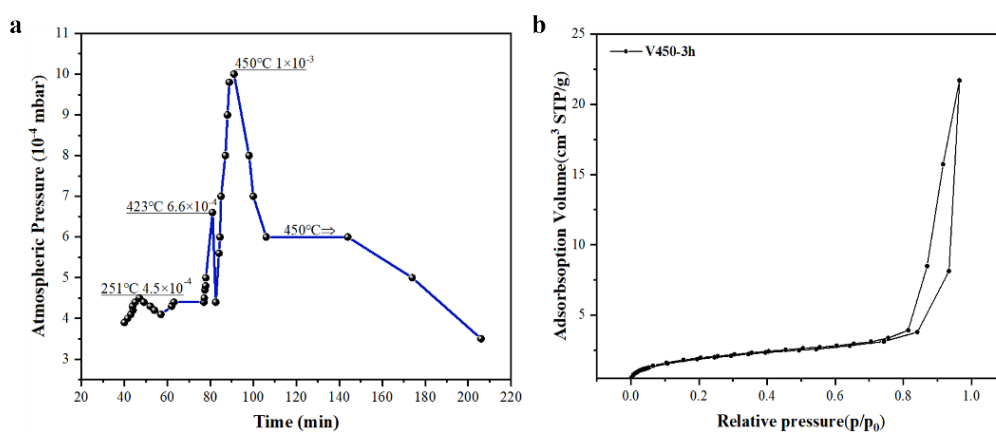

**Figure S6.** (a) Atmospheric pressure trend during vacuum pyrolysis and (b) N<sub>2</sub> adsorption isotherm of V450 (BET specific surface area of 7.0 m<sup>2</sup>/g) .

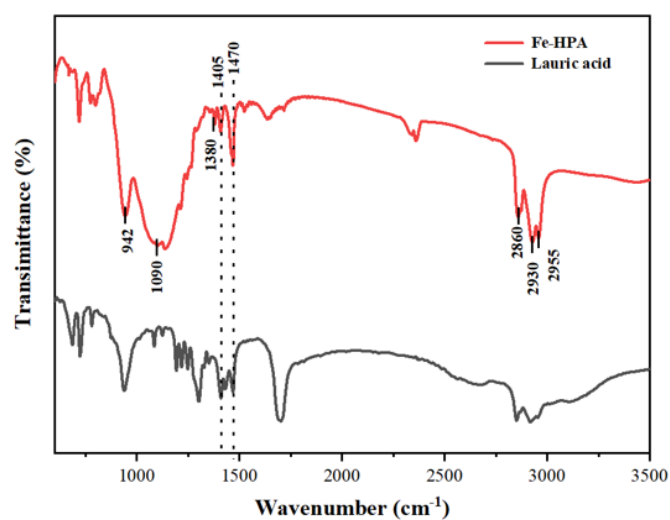

**Figure S7.** FTIR spectroscopy of Fe-HPA and lauric acid.

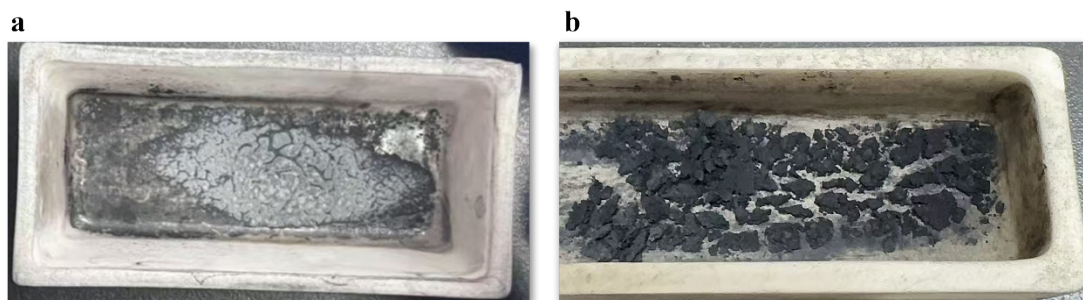

**Figure S8.** Picture showing the color and macroscopic morphology differences between (a) N450 and (b) V450.

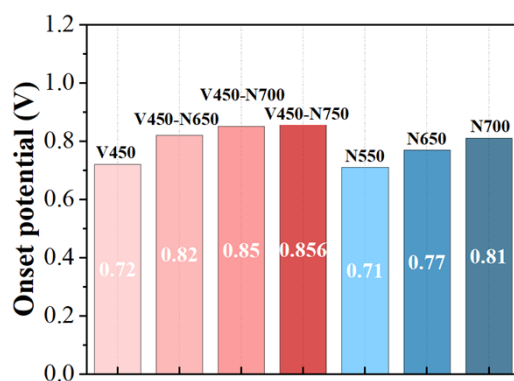

**Figure S9.** The Onset potential value for various samples.

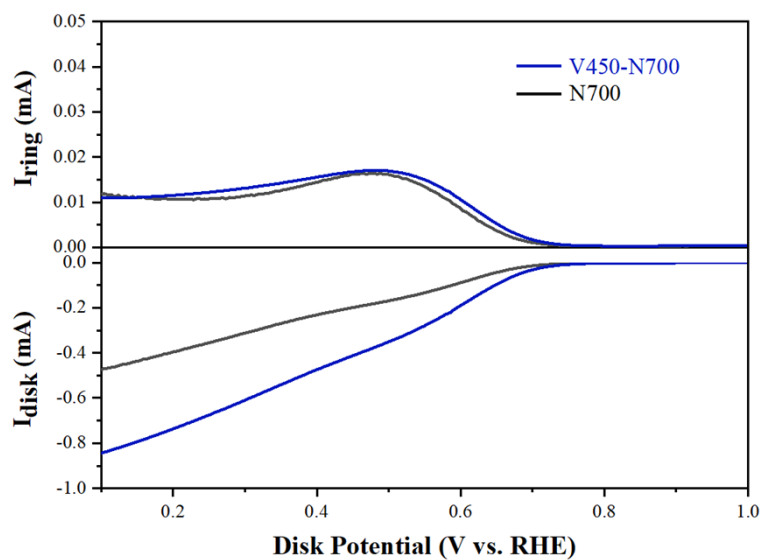

**Figure S10.** Disk and ring current as a function of the disk potential for V450-N700 and N700.

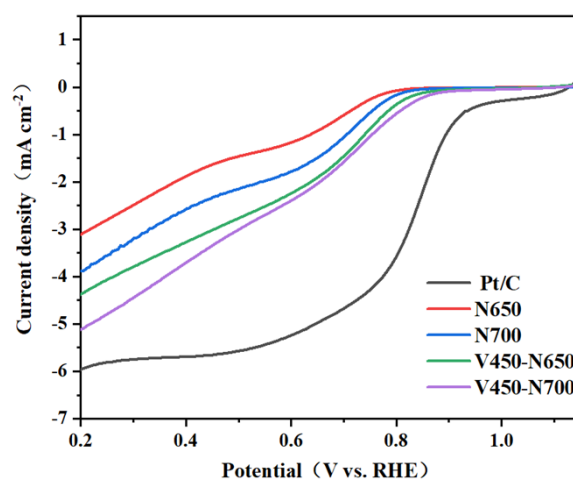

**Figure S11.** LSV curves of ORR for Pt/C and various samples under vacuum or N<sub>2</sub> atmospheres (N650, N700, V450-N650, N450-N700).

### 3. Tables

**Table S1.** Nomenclature and heat-treatment conditions for various samples. V or N-series indicate the single step treatments under vacuum or nitrogen. V-N series indicate the two-step treatments.

| Sample Name | Temperature (°C) | Holding time (h) | Atmosphere |
|-------------|------------------|------------------|------------|
|-------------|------------------|------------------|------------|

|           |     |     |                |
|-----------|-----|-----|----------------|
| V450      | 450 | 3   | Vacuum         |
| V450-N600 | 600 | 1   | N <sub>2</sub> |
| V450-N650 | 650 | 1   | N <sub>2</sub> |
| V450-N700 | 700 | 1   | N <sub>2</sub> |
| V450-N750 | 750 | 1   | N <sub>2</sub> |
| N450      | 450 | 3   | N <sub>2</sub> |
| N550      | 550 | 3   | N <sub>2</sub> |
| N600      | 600 | 3   | N <sub>2</sub> |
| N650      | 650 | 3   | N <sub>2</sub> |
| N700      | 700 | 3   | N <sub>2</sub> |
| V450-0.5h | 450 | 0.5 | Vacuum         |
| V500-1.5h | 500 | 1.5 | Vacuum         |
| V550-1h   | 550 | 1   | Vacuum         |

**Table S2.** Crystallite size calculations via Scherrer equation ( $k=0.9$ ,  $\lambda=1.54$  Å).

| Name             | peak | 2 $\theta$ | $\theta$ | cos $\theta$ | FWHM  | FWHM<br>in Rad | Crystal<br>size<br>(nm) | Average<br>(nm) |
|------------------|------|------------|----------|--------------|-------|----------------|-------------------------|-----------------|
| <b>N700</b>      | 1    | 29.41      | 14.705   | 0.967        | 0.448 | 0.00781        | 183.48                  | <b>176.41</b>   |
|                  | 2    | 30.15      | 15.705   | 0.965        | 0.515 | 0.00899        | 159.71                  |                 |
|                  | 3    | 34.14      | 17.07    | 0.955        | 0.447 | 0.00779        | 186.05                  |                 |
| <b>N750</b>      | 1    | 29.45      | 14.725   | 0.967        | 0.507 | 0.00886        | 161.89                  | <b>197.15</b>   |
|                  | 2    | 30.27      | 15.135   | 0.965        | 0.317 | 0.00554        | 259.43                  |                 |
|                  | 3    | 34.22      | 17.11    | 0.955        | 0.489 | 0.00853        | 170.13                  |                 |
| <b>V450-N700</b> | 1    | 29.42      | 14.71    | 0.967        | 0.570 | 0.00995        | 144.06                  | <b>113.88</b>   |
|                  | 2    | 30.21      | 15.105   | 0.965        | 0.682 | 0.01190        | 120.71                  |                 |
|                  | 3    | 34.8       | 17.4     | 0.954        | 1.083 | 0.01891        | 76.86                   |                 |
| <b>N450-N750</b> | 1    | 29.34      | 14.67    | 0.967        | 0.504 | 0.00879        | 162.99                  | <b>119.50</b>   |
|                  | 2    | 30.16      | 15.08    | 0.965        | 0.712 | 0.01242        | 115.59                  |                 |
|                  | 3    | 34.68      | 17.34    | 0.955        | 1.041 | 0.01817        | 79.93                   |                 |

**Table S3.** Element contents of different areas in Figure S3.

|         | Fe at% | P at% | O at% | C at% |
|---------|--------|-------|-------|-------|
| Area #1 | 11.18  | 10.25 | 51.76 | 26.8  |
| Area #2 | 10.04  | 9.01  | 48.47 | 32.48 |
| Area #3 | 23.08  | 12.9  | 37.17 | 26.85 |

**Table S4.** Mass loss data of V450 and N450.

| Sample | Initial Mass (mg) | Final Mass (mg) | Mass Remains |
|--------|-------------------|-----------------|--------------|
| V450   | 206               | 56              | 27.2%        |
| N450   | 54                | 18              | 33%          |

**Table S5.** ORR performance of the non-noble electrocatalysts.

| Catalyst                             | Electrolyte | Onset-potential (V<br>vs. RHE) | Ref                     |
|--------------------------------------|-------------|--------------------------------|-------------------------|
| Carbon Black (Macklin,<br>xc-72R)    | 0.1M KOH    | 0.69                           | Tested in<br>this work. |
| Co-N/C                               | 0.1M KOH    | 0.85                           | [2]                     |
| Mn(PO <sub>3</sub> ) <sub>2</sub> -C | 0.1M KOH    | 0.87                           | [3]                     |
| FeP/PC                               | 0.1M KOH    | 0.873                          | [4]                     |
| Fe-N-C                               | 0.1M KOH    | 0.98                           | [5]                     |

## References

1. Y. Zong, H. Xin, J. Zhang, X. Li, J. Feng, X. Deng, Y. Sun and X. Zheng, *Journal of Magnetism and Magnetic Materials*, 2017, **423**, 321-326.
2. L. An, W. Huang, N. Zhang, X. Chen and D. Xia, *Journal of Materials Chemistry A*, 2014.
3. MinZhou, JinghuiGuo, RuihuLu, JiantaoLi, SungsikLee, ChunhuaHan, XiaobinLiao, PingLuo, YanZhao and ZhaoyangWang, *Interdisciplinary Materials*, 2024, **4**, 309-320.
4. X. Lian-Hua, C. Peng-Cheng, Z. Xue-Ji, C. Serge and S. Dan, *Applied Surface Science*, 2023, **620**.
5. B. Hou, C. C. Wang, R. Tang, Q. Zhang and X. Cui, *Materials Research Express*, 2020, **7**, 025506-025506.
